# Supplementary material for: Morphological Analysis, Protein Profiling and Expression Analysis of Auxin Homeostasis Genes of Roots of Two Contrasting Cultivars of Rice Provide Inputs on Mechanisms Involved in Rice Adaptation towards Salinity Stress
Source: MDPI journal article supplement (doi:10.3390/plants10081544), 2021-07-28
Supplement: s1 [file s1]

**Morphological analysis, protein profiling and expression analysis of auxin homeostasis genes of roots of two contrasting cultivars of rice provide inputs on mechanisms involved in rice adaptation towards salinity stress**

Shivani Saini<sup>1</sup>, Navdeep Kaur<sup>1</sup>, Deeksha Marothia<sup>1</sup>, Baldev Singh<sup>1</sup>, Varinder Singh<sup>1</sup>, Pascal Gantet<sup>2,3\*</sup> and Pratap Kumar Pati<sup>1\*</sup>

<sup>1</sup> Department of Biotechnology, Guru Nanak Dev University, Amritsar-143005, Punjab, India

<sup>2</sup> Université de Montpellier, UMR DIADE, Centre de Recherche de l'IRD, Avenue Agropolis, BP 64501, 34394, Montpellier cedex 5, France

<sup>3</sup>Department of Molecular Biology, Centre of the Region Haná for Biotechnological and Agricultural Research, Palacký University Olomouc, Šlechtitelů 27, Olomouc, 783 71, Czech Republic

**\*Correspondence**

Dr. Pratap Kumar Pati,

Department of Biotechnology, Guru Nanak Dev University, Amritsar-143005 (Punjab), India.

E-mail: pkpati@yahoo.com, Tel: +91-183-2255802-09 Ext No. 3177, Fax: +91-183-2258272.

**\*Co-Correspondence**

Dr. Pascal Gantet

<sup>2</sup> Université de Montpellier, UMR DIADE, Centre de Recherche de l'IRD, Avenue Agropolis, BP 64501, 34394, Montpellier cedex 5, France

<sup>3</sup>Department of Molecular Biology, Centre of the Region Haná for Biotechnological and Agricultural Research, Palacký University Olomouc, Šlechtitelů 27, Olomouc, 783 71, Czech Republic

E-mail:pascal.gantet@umontpellier.fr

**Supplementary Material**

**Table S1.** List of primers used for quantitative real time polymerase chain reaction.

| Gene            | Locus ID       | Forward primer                       | Reverse Primer               |
|-----------------|----------------|--------------------------------------|------------------------------|
| <i>OsYUCCA1</i> | LOC_Os01g45760 | 5'-<br>GGACGCTAGACCACATCAAATC-<br>3' | 5'-AATTGCTCCTCCTTGCCATC-3'   |
| <i>OsYUCCA2</i> | LOC_Os05g452   | 5'-                                  | 5'-GTAACCCGTGGCGAGTATAATG-3' |

|                 |                  |                              |                              |
|-----------------|------------------|------------------------------|------------------------------|
|                 | 40               | CATCAAGGTGTATCCGGAGTTG-3'    |                              |
| <i>OsYUCCA3</i> | LOC_Os01g53200   | 5'-GATTGATGGCCTAGACGACTTC-3' | 5'-CACTCCCAACAACGAGAACA-3'   |
| <i>OsYUCCA4</i> | LOC_Os01g12490   | 5'-GAACCCTAGCCAAGATCAAGTC-3' | 5'-AGTGCTGCCATCCACAAA-3'     |
| <i>OsYUCCA5</i> | LOC_Os12g32750   | 5'-CCTCTCAGTGTTCTTCTCAAG-3'  | 5'-CGGAGGCCGTATTTCTCAAT-3'   |
| <i>OsYUCCA6</i> | LOC_Os07g25540   | 5'-TCATACTGGCCACCGGATA-3'    | 5'-TTCCAACCATCTGGGAATGG-3'   |
| <i>OsYUCCA7</i> | LOC_Os04g03980   | 5'-CGACATCAACCCGCTCTT-3'     | 5'-GCTGCCAATGTACTCCATCT-3'   |
| <i>OsYUCCA8</i> | LOC_Os04g03980   | 5'-GGCCCATTGGAGATCAAGAA-3'   | 5'-CTCCACCTCCGGTACTATCTT-3'  |
| <i>OsYUCCA9</i> | LOC_Os01g16714.1 | 5'-GAATCTACGGCAGCTACGAG-3'   | 5'-AGCCATTGTTGTGGGTAGG-3'    |
| <i>OsPIN1a</i>  | LOC_Os02g50960   | 5'-GACCTCCACATGTTCTGTCTG-3'  | 5'-GTCCTTCGCTCCATCCATTT-3'   |
| <i>OsPIN1b</i>  | LOC_Os11g64190   | 5'-GAATCGTGCCCTTTGTGTTTG-3'  | 5'-GAGCAATCAGCATCCCGAATA-3'  |
| <i>OsPIN1c</i>  | LOC_Os06g12610   | 5'-ATCACCTCTTCTCCCTCTC-3'    | 5'-GATCTGCACCATGAGGCTAC-3'   |
| <i>OsPIN1d</i>  | LOC_Os12g04000   | 5'-CGGTCGATTTCGATCCTTTCA     | 5'-GCATACGAAGCAAGGGAGTT-3'   |
| <i>OsPIN2</i>   | LOC_Os06g44970   | 5'-AGGCATTGTCCCGTTTGT-3'     | 5'-GTAGAGTATCGTGATCGGAAGC-3' |
| <i>OsPIN3a</i>  | LOC_Os01g45550   | 5'-ACACTTACTCCAGCCTCCT-3'    | 5'-GAGATGGACTTCTCGACGATTG-3' |
| <i>OsPIN5a</i>  | LOC_Os01g69090   | 5'-CCCTACCTCAATCCATCACATC-3' | 5'-GTAGGGAGACAAGCATTCCAA-3'  |
| <i>OsPIN5b</i>  | LOC_Os09g32770   | 5'-ACAGGTGGCATGTCGAAAC-3'    | 5'-CTGCAACGCCATGAACAAAC-3'   |
| <i>OsPIN9</i>   | LOC_Os01g58860   | 5'-AAGCTTCCTTGGCCTCATC-3'    | 5'-GGTACGAATGGTGAACAGAGAG-3' |

|                   |                      |                                        |                              |
|-------------------|----------------------|----------------------------------------|------------------------------|
| <i>OsGH3.8</i>    | LOC_Os07g402<br>90.1 | 5'-<br>CTCTACTTCCTGTTTCGTCAAGTC-<br>3' | 5'-TTGAAGTGGTCGCTCTTGTAG     |
| <i>OsGH3.13</i>   | LOC_Os11g325<br>10   | 5'-<br>CACTACGTGCCACCTTGTCTT-3'        | 5'-GTGTCCTCTTCTGGGA-3'       |
| <i>OsTIR1</i>     | LOC_Os05g058<br>00   | 5'-<br>GACCAGATGTCACAACCTGAA-3'        | 5'-CAACTAGCTGAGGAGCCTTATG-3' |
| <i>OsAFB2</i>     | LOC_Os04g324<br>60   | 5'-GGTTCAGGGCTCTTGTTCCTTA-<br>3'       | 5'-CCTCGATCCTCCACTTCATTT-3'  |
| <i>OsABP1</i>     | LOC_Os12g344<br>60   | 5'-<br>AAAGGGAAAGGGACACTCTTG-<br>3'    | 5'-ACCTGGTGCGGATCATTAC-3'    |
| <i>OsARF1</i>     | LOC_Os11g321<br>10   | 5'-<br>GGAAGATCCTGTGTGAGGTTATG<br>-3'  | 5'-CTCCTCAGTAGAGCCGTTATCT-3' |
| <i>OsARF2</i>     | LOC_Os01g702<br>70   | 5'-<br>CGAGCCCTTCAGAGTTCATTAT-<br>3'   | 5'-TGCCTCTTCTCCTTCAAACC-3'   |
| <i>OsARF16</i>    | LOC_Os01g135<br>20   | 5'-CGTCTGTTTGGTGTGGATTG-<br>3'         | 5'-TCGTGAGAACCAGTACCTTTG-3'  |
| <i>OsAUX/IAA1</i> | LOC_Os01g083<br>20   | 5'-CCCTGGAAGATGTTTGTGGA-3'             | 5'-GGCTCTTGGTGCTAAGTTGA-3'   |
| <i>OsAUX/IAA4</i> | LOC_Os01g183<br>60   | 5'-ATGTTCAAGACGCCCATCA-3'              | 5'-GTCTTCATAGGTGAGGACATGG-3' |
| <i>CIPK21</i>     | LOC_Os07g442<br>90   | 5'-<br>CCGGAGAATGTCCTAGTTGATG-<br>3'   | 5'-CACATGTGGTATGCAACAATCC-3' |
| <i>CCoA9</i>      | Os04g0100075         | 5'-ACCTGGTGTCCAACCTCT-3'               | 5'-ATGTGGAAGAACGGCATGAG-3'   |
| <i>B-glu</i>      | LOC_Os04g398<br>80   | 5'-TACCACAAGCACCTCCTTTC-3'             | 5'-CGTTCGACCACTCGAAGTTAT-3'  |
| <i>PSK</i>        | LOC_Os03g010<br>08.1 | 5'-<br>GGAAACTACGATGGTAGAGTGG-<br>3'   | 5'-TAGTCCAGATGAGCCACGA-3'    |
| <i>P5CS</i>       | LOC_Os05g381<br>50   | 5'-<br>GGTACCGGAAGCTTGTCAATAG-<br>3'   | 5'-GTAAAGAGCCATCAGTCCACTC-3' |
| <i>CHS</i>        | LOC_Os10g332<br>70.1 | 5'-<br>TGAGGAGTTTGGTGTGGAATC-<br>3'    | 5'-GACCACCACGCGATCTTT-3'     |
| <i>DEAD</i>       | LOC_Os07g050<br>50   | 5'-<br>CTGCTCGTGGATTAGACATACC-<br>3'   | 5'-CACTTCCTTCTTCCCTGCT-3'    |

|                             |                  |                                        |                              |
|-----------------------------|------------------|----------------------------------------|------------------------------|
| <i>RAS-LRR</i>              | LOC_Os02g38040   | 5'-<br>AAGAATGTCCCAGATGCCATAG-<br>3'   | 5'-TCTTGAGGCTGGTGAGGA-3'     |
| <i>B3D</i>                  | LOC_Os01g52540   | 5'-<br>GAGAAGTGTAGGCTAGTTGATG<br>AG-3' | 5'-CTTCGTGGAGTTTCAGGACTAC-3' |
| <i>MCM6</i>                 | LOC_Os05g14590.1 | 5'-<br>GCTGGAGACACGGTCATATTTA-<br>3'   | 5'-GGACACCAGACCCATTCTTT-3'   |
| <i>Ubiquitin5</i><br>(UBQ5) | LOC_Os1g328400   | 5'-CCTTCATGGCCAACCACTT-3'              | 5'-CTAAGCCTGCTGGTTGTAGAC-3'  |
